# Supplementary material for: Methylation of the Claudin 1 Promoter Is Associated with Loss of Expression in Estrogen Receptor Positive Breast Cancer
Source: PubMed Central journal article supplement (PMC3701071; doi:10.1371/journal.pone.0068630), 2013-07-03
Supplement: pone.0068630.s001.pdf [file pone.0068630.s001.pdf]

**Table S1. Cell culture conditions.** Cell lines were incubated in the indicated media at 37.0°C in 95% air, 5% carbon dioxide humid atmosphere.

| Cell line      | Base Medium                        | FBS | Additives                                                                                                        |
|----------------|------------------------------------|-----|------------------------------------------------------------------------------------------------------------------|
| BT-20          | MEM (Cellgro® 10-010)              | 10% |                                                                                                                  |
| BT-474         | Hybri-Care Medium (ATCC® 46-X)     | 10% | 1.5 g/L sodium bicarbonate                                                                                       |
| CAMA-1         | MEM (Cellgro® 10-010)              | 10% | non-essential amino acids, 1mM sodium pyruvate                                                                   |
| EFM19          | RPMI-1640 (Cellgro® 10-040)        | 10% |                                                                                                                  |
| EFM192A        | RPMI-1640 (Cellgro® 10-040)        | 10% |                                                                                                                  |
| HCC1187        | RPMI-1640 (Cellgro® 10-040)        | 10% |                                                                                                                  |
| HCC1419        | RPMI-1640 (Cellgro® 10-040)        | 10% |                                                                                                                  |
| HCC1500        | RPMI-1640 (Cellgro® 10-040)        | 10% |                                                                                                                  |
| HCC1569        | RPMI-1640 (Cellgro® 10-040)        | 10% |                                                                                                                  |
| HCC1937        | RPMI-1640 (Cellgro® 10-040)        | 10% |                                                                                                                  |
| HCC1954        | RPMI-1640 (Cellgro® 10-040)        | 10% |                                                                                                                  |
| HCC38          | RPMI-1640 (Cellgro® 10-040)        | 10% |                                                                                                                  |
| MCF 10A        | DMEM:F12 (Gibco® 11330)            |     | 20 ng/ml Human EGF, 100 ng/ml cholera toxin, 0.01 mg/ml bovine insulin, 500 ng/ml hydrocortisone, 5% horse serum |
| MCF7           | MEM (Cellgro® 10-010)              | 10% | 0.01 mg/ml bovine insulin                                                                                        |
| MDA-MB-175-VII | DMEM (Cellgro® 10-013)             | 10% |                                                                                                                  |
| MDA-MB-231     | DMEM (Cellgro® 10-013)             | 10% |                                                                                                                  |
| MDA-MB-361     | DMEM (Cellgro® 10-013)             | 20% |                                                                                                                  |
| MDA-MB-415     | DMEM (Cellgro® 10-013)             | 15% | 0.01 mg/ml bovine insulin, 10 ug/ml glutathione                                                                  |
| MDA-MB-436     | DMEM (Cellgro® 10-013)             | 10% | 0.01 mg/ml bovine insulin, 16 ug/ml glutathione                                                                  |
| MDA-MB-453     | DMEM (Cellgro® 10-013)             | 10% |                                                                                                                  |
| MDA-MB-468     | DMEM (Cellgro® 10-013)             | 10% |                                                                                                                  |
| SK-BR-3        | McCoy's 5A, Mod. (Cellgro® 10-050) | 10% |                                                                                                                  |
| SUM 149PT      | DMEM:F12 (Gibco® 11330)            | 5%  | 0.005 mg/ml bovine insulin, 1 ug/ml hydrocortisone, 10mM HEPES                                                   |
| SUM 159PT      | DMEM:F12 (Gibco® 11330)            | 5%  | 0.005 mg/ml bovine insulin, 1 ug/ml hydrocortisone, 10mM HEPES                                                   |
| T47D           | RPMI-1640 (Cellgro® 10-040)        | 10% | 0.01 mg/ml bovine insulin                                                                                        |
| ZR-75-1        | RPMI-1640 (Cellgro® 10-040)        | 10% |                                                                                                                  |
| ZR-75-30       | RPMI-1640 (Cellgro® 10-040)        | 10% |                                                                                                                  |
