# Supplementary material for: Methylation of the Claudin 1 Promoter Is Associated with Loss of Expression in Estrogen Receptor Positive Breast Cancer
Source: PubMed Central journal article supplement (PMC3701071; doi:10.1371/journal.pone.0068630), 2013-07-03
Supplement: pone.0068630.s002.pdf [file pone.0068630.s002.pdf]

**Table S2. MSP primers.**

---

|              |                                            |
|--------------|--------------------------------------------|
| CLDN1(1)_US  | 5'-GTTAGGGGGTGTGTTTTGGTTGTTG-3'            |
| CLDN1(1)_UAS | 5'-ACTACAATTACTCCCAAACCTCAAAAACATAAAACA-3' |
| CLDN1(1)_MS  | 5'-GGGGCGTTTTTCGGTTGTC-3'                  |
| CLDN1(1)_MAS | 5'-TACGATTACTCCCAAACCTCGAAAACATAAAACG-3'   |
| CLDN1(2)_US  | 5'-TTTTAGTGTTGTTTTGGGTGTGGATTTTAATTTTG-3'  |
| CLDN1(2)_UAS | 5'-AAAATAACTAAACCCACAAAAAAATTAAAACA-3'     |
| CLDN1(2)_MS  | 5'-TTTCGGGCGCGGATTTTAATTTTC-3'             |
| CLDN1(2)_MAS | 5'-AAATAACTAAACCCCGCGAAAAAAATTAAAACG-3'    |
| CLDN1(3)_US  | 5'-GGGTGTTTGAGTGAGTTATGGTTAATGTG-3'        |
| CLDN1(3)_UAS | 5'-CCTCCACTAAAACAAAACAATACTAACAATAACA-3'   |
| CLDN1(3)_MS  | 5'-TCGAGCGAGTTATGGTTAACGC-3'               |
| CLDN1(3)_MAS | 5'-CTCCACTAAAACAAAACAATACTAACGATAACG-3'    |

---
